# Supplementary material for: MIPSTR: a method for multiplex genotyping of germline and somatic STR variation across many individuals
Source: HighWire-hosted journal article supplement (doi:10.1101/gr.182212.114), 2015-02-06
Supplement: Supp_Fig_Legends.docx [file Supp_Fig_Legends.docx]

**Figure S1. Theoretical number of STR informative reads given different read lengths, sequencing coverage, and total STR length.** For example, at 20X sequencing coverage with 101bp read length, a 60bp STR will be represented by only six STR-spanning, informative reads. To calculate the theoretical number of STR informative reads, we required 8 bp of flanking sequence on both sides. We then calculate the theoretical number of read-start sites that would allow a sequence read of a given length “L” to span an STR of a given size “X” with 8 bp flanking (L-X-[16-1]). To determine the expected number of reads with start sites resulting in an STR-spanning read, this term is multiplied by (coverage/L), *i.e*. the expected number of reads starting at a given genomic location.

**Figure S2. Characteristics of smMIP target STRs.** A) Distribution in genomic functional regions. The four STRs located in transposons consist of two pairs of duplicated loci, both members of a pair are targeted with the same probe. Gene proximal STRs are within 1 kb of a gene. DHS are DNase I hypersensitive sites (Sullivan *et al.* 2014). B) The targets are distributed evenly throughout the genome. C) The targets are all tri- or hexa- nucleotide STRs. The duplicated STR loci are hexamers.

**Figure S3.** MIPSTR successfully captured all 102 STR target loci in Col-0. A) X-axis, 100 smMIPs targeting different STRs. Y-axis, read count for each smMIP before correction for poorly performing MIPs. Grey bars, total reads. Blue bars, informative reads. The most poorly performing MIP was represented by 196 total reads. As previously observed, smMIP capture efficiency differed among probes (Hiatt et al. 2013). Note that two smMIPs capture duplicate loci (100 smMIPs, 102 STR target loci). B) X-axis, 100 smMIPs targeting different STRs in same order as A. Y-axis, percentage of total reads corresponding to each MIP. Grey bars, before correction. Pink bars, after correction.

**Figure S4.** MIPSTR detects decreased genome stability in Atmsh2 mutants. X-axis, Col-0 control or Atmsh2 mutant plants. Y-axis, average number of alleles per STR locus (no somatic variation in homozygous plants equals one allele). Standard error is indicated with black lines. To calculate the average number of alleles per locus, we re-sampled tag-defined read group modes at each STR locus 1000 times. The number of alleles supported by at least one tag-defined read group per sample was averaged across STR loci. A) Data for three Col-0 plants and three Atmsh2 plants. B) Data for two Col-0 plants and two Atmsh2 plants with the outliers removed (greater than two-fold higher depth of coverage).
