# Supplementary material for: MIPSTR: a method for multiplex genotyping of germline and somatic STR variation across many individuals
Source: HighWire-hosted journal article supplement (doi:10.1101/gr.182212.114), 2015-02-06
Supplement: Supp_Tables1-4.xlsx [file Supp_Tables1-4.xlsx]

## Sheet: Supplemental Table 1
	Supplemental Table 1. Target STR loci characteristics and MIP oligonucleotide sequences.
MIP_ID	Chr	Genomic Start	Genomic End	annotation	Unit Size	Copy #a	STR Locus Size	VARscore	Technical error rate	Unit	Nearest gene within 1 kb	Probe Sequence
1	2	18314758	18314815	exon/DHS	3	17	51	1.0379	0.228099	CAA	AT2G44340.1	ctaatcgcaacgataaggtcaCTTCAGCTTCCCGATCCGACGGTAGTGTNNNNNNNNNNNNattacttctcttcgtttcc
2	1	7620363	7620405	exon	3	12	36	1.0943	0.135645	TTG	AT1G21700.1	gctgatgcatgagagaattgatgCTTCAGCTTCCCGATCCGACGGTAGTGTNNNNNNNNNNNNacgtttggtgaagctgt
3	2	18706188	18706207	exon/DHS	3	6	18	0.303382	0.0303491	GTT	AT2G45400.1	acgtcatttactctctcacacctaCTTCAGCTTCCCGATCCGACGGTAGTGTNNNNNNNNNNNNaaaccagaacctcccg
4	3	5513041	5513063	exon	3	7	21	0.516554	0.027877	GAA	AT3G16270.1	ccctgtttttgactgtgttgtCTTCAGCTTCCCGATCCGACGGTAGTGTNNNNNNNNNNNNatatgcacaatacatgcat
5	3	6375806	6375908	exon	6	14	84	1.12634	NA	GGGATG	AT3G18540.1	gaaagggacatccaagaatccCTTCAGCTTCCCGATCCGACGGTAGTGTNNNNNNNNNNNNgaaactgaaagaaggggtt
6	3	8125754	8125823	exon	3	22	66	0.897878	0.27368	GTT	AT3G22930.1	gctttgaagtgcttcaactctCTTCAGCTTCCCGATCCGACGGTAGTGTNNNNNNNNNNNNtgtcgaatagacaaaaagc
7	3	11005983	11006030	exon/DHS	3	16	48	1.11862	NA	GAT	AT3G29000.1	gagtttgttcgaagagaaagaaCTTCAGCTTCCCGATCCGACGGTAGTGTNNNNNNNNNNNNcaacatcatcaacgcgtt
8	3	21470370	21470408	exon	3	13	39	1.09264	0.126674	GTT	AT3G57990.1	gctctctttaactgcttgttctCTTCAGCTTCCCGATCCGACGGTAGTGTNNNNNNNNNNNNtgccctcttccttgcttt
9	4	6705790	6705833	exon/DHS	6	7	42	0.471118	0.0142003	CCTTCT	AT4G10930.1	cgacttcggatggattcaaagCTTCAGCTTCCCGATCCGACGGTAGTGTNNNNNNNNNNNNgtctttcaactagtttctc
10	4	6927139	6927205	exon	3	22	66	0.913445	0.236277	TTC	AT4G11385.1	attgttgtggacgctcagaaCTTCAGCTTCCCGATCCGACGGTAGTGTNNNNNNNNNNNNgacttttaattagagagaga
11	4	7654240	7654275	exon	6	6	36	0.163536	0.00571655	CAAGAA	AT4G13160.1	aaagctgctttaatggttgaatCTTCAGCTTCCCGATCCGACGGTAGTGTNNNNNNNNNNNNgcatccaaaaacttctct
12	4	9870034	9870097	exon	3	19	57	0.955203	0.237841	TTG	AT4G17740.1	gtattccctcaagctgaatcgCTTCAGCTTCCCGATCCGACGGTAGTGTNNNNNNNNNNNNctgtttctgatgtgagaag
13	1	17882875	17883004	3'UTR	3	41	123	2.06203	0.462816	ATC	AT1G48400.1	aatcgaaatcaacaacatcatactCTTCAGCTTCCCGATCCGACGGTAGTGTNNNNNNNNNNNNgcgcctttggttctac
14	5	162807	162838	exon	3	10	30	0.944588	0.108498	TCT	AT5G01390.1	gtctggcttgacgcttgaggCTTCAGCTTCCCGATCCGACGGTAGTGTNNNNNNNNNNNNgcttcattcactcttcttct
15	5	9279547	9279593	exon	3	15	45	1.12235	0.15884	CAT	AT5G26673.1	cgttttccggataataataagttCTTCAGCTTCCCGATCCGACGGTAGTGTNNNNNNNNNNNNagaccaaagcctagaca
16	5	19532685	19532730	exon	6	6	36	0.469803	0.0166667	GTTCCG	AT5G48170.1	cgtagtaatggacacagtaaagCTTCAGCTTCCCGATCCGACGGTAGTGTNNNNNNNNNNNNgtaaccataaaagtcgga
17	5	19909249	19909299	exon	3	15	45	1.09903	0.154543	GTT	AT5G49120.1	attttttttggattcgccgagaCTTCAGCTTCCCGATCCGACGGTAGTGTNNNNNNNNNNNNcggtggtgacaataatgt
18	5	20208555	20208590	exon	3	12	36	1.04471	0.103047	GAT	AT5G49740.1	ggcttttaaggaggcgttacCTTCAGCTTCCCGATCCGACGGTAGTGTNNNNNNNNNNNNacatcataaggaacacaacc
19	1	22209614	22209650	exon	3	11	33	1.00818	0.0614015	TGA	AT1G60220.1	actgctggttactgcaattttCTTCAGCTTCCCGATCCGACGGTAGTGTNNNNNNNNNNNNttgattctggacttaaaga
20	1	26124881	26124907	exon	3	9	27	0.738874	0.0590172	CAA	AT1G69500.1	actctcgaggtttatcgagatCTTCAGCTTCCCGATCCGACGGTAGTGTNNNNNNNNNNNNtgcttggtaaaagcataaa
21	2	17589105	17589147	exon	3	14	42	1.12285	0.10329	ACA	AT2G42200.1	gccttgggtattcaaggacaCTTCAGCTTCCCGATCCGACGGTAGTGTNNNNNNNNNNNNttatggacactaaactagag
22	2	11062720	11062741	exon	3	7	21	0.435838	0.0419106	CAA	AT2G25930.1	cagccaacaaagtcttatccgcCTTCAGCTTCCCGATCCGACGGTAGTGTNNNNNNNNNNNNaatatcaccccggcatgg
23	2	13034349	13034384	exon	3	12	36	1.04471	0.0745114	ACA	AT2G30590.1	aagctgagcttatgcttaggCTTCAGCTTCCCGATCCGACGGTAGTGTNNNNNNNNNNNNagtttaaactcaaatgctaa
24	2	14195301	14195346	exon	3	8	24	1.10827	NA	AAG	AT2G33510.1	gatcgacctcattctgcatcCTTCAGCTTCCCGATCCGACGGTAGTGTNNNNNNNNNNNNagaagaagatagctcatatt
25	2	17782440	17782482	exon	6	6	36	0.410409	0.0115962	TCTTCA	AT2G42700.1	gaaccgaaaaatgttgaatcgCTTCAGCTTCCCGATCCGACGGTAGTGTNNNNNNNNNNNNaagctcctactctctcaag
26	1	4196770	4196789	DHS	3	6	18	0.303382	0.0217885	GTT	AT1G12340.1	gtaacaaaatgggccgtttctCTTCAGCTTCCCGATCCGACGGTAGTGTNNNNNNNNNNNNtgtcttgtgaggttgtaat
27	1	9321639	9321677	DHS	3	13	39	1.09264	0.131767	TTC	AT1G26900.1	gattcgttctctgcatatcgtCTTCAGCTTCCCGATCCGACGGTAGTGTNNNNNNNNNNNNccttattttggtccaaatc
28	1	10468136	10468158	DHS	3	7	21	0.516554	0.0381269	AGA	AT1G29890.1	attccactttcttctctcgcCTTCAGCTTCCCGATCCGACGGTAGTGTNNNNNNNNNNNNgaataatccaaatttcgaga
29	1	11221478	11221502	DHS	3	8	24	0.6266	0.0433816	AAT	AT1G31350.1	attccaaatcttcgccggctcCTTCAGCTTCCCGATCCGACGGTAGTGTNNNNNNNNNNNNcatttgcagtgcaggtatt
30	1	18040258	18040277	DHS	3	6	18	0.303382	0.0214013	GAA	AT1G48760.1	atctaccatctcctcctccttCTTCAGCTTCCCGATCCGACGGTAGTGTNNNNNNNNNNNNaaaaaaagaaggaaaacga
31	1	22067341	22067363	plus/minus 1kb	3	7	21	0.516554	0	TTG	AT1G59950.1	gctatgtcttgtctccacttatCTTCAGCTTCCCGATCCGACGGTAGTGTNNNNNNNNNNNNttggattaccaaccaaac
32	2	1676846	1676865	DHS	3	6	18	0.303382	0.0253525	CAA	AT2G04780.1	cctctgcttctcttcatcttcCTTCAGCTTCCCGATCCGACGGTAGTGTNNNNNNNNNNNNatggttaaacaaagcaaaa
33	2	14518530	14518566	plus/minus 1kb	3	12	36	1.06157	0.2	TCT	AT2G34400.1	cccttcttttttgtttccagttttCTTCAGCTTCCCGATCCGACGGTAGTGTNNNNNNNNNNNNccgtttgggtgagctt
34	3	489587	489608	DHS	3	7	21	0.435838	0.0255532	ACA	AT3G02380.1	gtttgtacaatgcaaaagcccCTTCAGCTTCCCGATCCGACGGTAGTGTNNNNNNNNNNNNccctttgttttggtttttt
35	3	8378270	8378290	DHS	3	7	21	0.37134	0.0306396	AGA	AT3G23400.1	cgttttgtgccacaaaattttaCTTCAGCTTCCCGATCCGACGGTAGTGTNNNNNNNNNNNNaagaagagctggtggtga
36	3	20648968	20648988	plus/minus 1kb	3	7	21	0.37134	0.0254962	ACA	AT3G55660.1	gctttctttggaccaaacccCTTCAGCTTCCCGATCCGACGGTAGTGTNNNNNNNNNNNNtcttttgactcttgtttgat
37	4	10773800	10773824	exon/DHS	3	8	24	0.6266	0.0467171	GAT	AT4G19830.1	cgaatcatttttctttcctttttCTTCAGCTTCCCGATCCGACGGTAGTGTNNNNNNNNNNNNcggagacgagaagcaaa
38	4	14801596	14801615	DHS/non gene	3	6	18	0.303382	0.0432685	CAA	.	caatataccccgtctagtttaatCTTCAGCTTCCCGATCCGACGGTAGTGTNNNNNNNNNNNNggtgggtaggcgagaga
39	5	1764649	1764670	DHS	3	7	21	0.435838	0.0431052	GAA	AT5G05850.1	cgtggttttgtattaatacaagacCTTCAGCTTCCCGATCCGACGGTAGTGTNNNNNNNNNNNNcggtgaatgaagggag
40	5	4050461	4050486	DHS	3	8	24	0.526017	0.0422131	TCT	AT5G12840.1	gcccgttgtagatttaacaactCTTCAGCTTCCCGATCCGACGGTAGTGTNNNNNNNNNNNNgcagtgatagagagagaa
41	5	16630726	16630747	plus/minus 1kb	3	7	21	0.435838	0.0262805	GAA	AT5G41580.1	agtccatgtaattaattttgctttCTTCAGCTTCCCGATCCGACGGTAGTGTNNNNNNNNNNNNccgtaagccagttcca
42	5	18311651	18311774	intergenic	3	41	123	2.02494	0.424476	AAG	.	gcaagaactccaagaaccctCTTCAGCTTCCCGATCCGACGGTAGTGTNNNNNNNNNNNNattctttaatatctccaacc
43	1	4546304	4546380	intron	3	24	72	0.846337	0.256545	TTC	AT1G13270.2	agaggtattgcagtttgtaaagCTTCAGCTTCCCGATCCGACGGTAGTGTNNNNNNNNNNNNagaagttgacgaaggttt
44	1	10655849	10655943	intron	3	30	90	0.973647	0.363995	TTC	AT1G30270.1	gtggggagcttttcgataaaCTTCAGCTTCCCGATCCGACGGTAGTGTNNNNNNNNNNNNtggctaatcatatgtatgta
45	1	15893756	15893803	intron	3	16	48	1.11862	0.159897	CTT	AT1G42430.1	aaacgggtaaggaactttgttCTTCAGCTTCCCGATCCGACGGTAGTGTNNNNNNNNNNNNagagaaatttttcagtggg
46	2	13417418	13417442	intron	3	8	24	0.6266	0.0502289	TTC	AT2G31510.1	aaatcttttgatggaccttccgCTTCAGCTTCCCGATCCGACGGTAGTGTNNNNNNNNNNNNtaccacaggacctaacat
47	3	8695278	8695337	intron	6	10	60	0.911753	0.015223	AGCCTC	AT3G24070.1	gctccttgaccttatgcctattCTTCAGCTTCCCGATCCGACGGTAGTGTNNNNNNNNNNNNaggaggaagcttcttctc
48	3	15666247	15666276	intron	3	10	30	0.870827	0.0988123	AGA	AT3G43810.1	gtcttcttcggattttctcgaCTTCAGCTTCCCGATCCGACGGTAGTGTNNNNNNNNNNNNagatcgttcttcaaatcac
49	4	941710	941747	intron/DHS	3	12	36	1.0807	0	TCC	AT4G02120.1	gttgttggggagcaggtacacCTTCAGCTTCCCGATCCGACGGTAGTGTNNNNNNNNNNNNtctgctaaatcataggtga
50	4	6947039	6947076	intron	3	12	36	1.0807	0.141825	GAA	AT4G11420.1	aaaaggccacatgtttgttttgCTTCAGCTTCCCGATCCGACGGTAGTGTNNNNNNNNNNNNttgagttcaagggcagga
51	4	7807196	7807265	intron	3	23	69	0.883484	0.29484	AGA	AT4G13430.1	caccaggaccacaaacatcaCTTCAGCTTCCCGATCCGACGGTAGTGTNNNNNNNNNNNNagtaaacaatcacaataagt
52	4	11293784	11293817	intron	3	8	24	0.996479	0.0917178	AGA	AT4G21190.1	atcgaaacacatattgttcaactCTTCAGCTTCCCGATCCGACGGTAGTGTNNNNNNNNNNNNgctttttggtgaagagc
53	5	9028125	9028162	intron/DHS	3	12	36	1.0807	0.120439	TGT	AT5G25880.1	gtctacagaaacttccgttaaaCTTCAGCTTCCCGATCCGACGGTAGTGTNNNNNNNNNNNNtacgaactcggttagttt
54	5	24076337	24076374	intron	3	12	36	1.0807	0.0946784	ATG	AT5G59760.1	aatggttgcttggaccctatataCTTCAGCTTCCCGATCCGACGGTAGTGTNNNNNNNNNNNNgctctgtagattctgcc
55	5	26497692	26497719	DHS	3	8	24	0.78188	0.0434859	AGA	AT5G66320.1	cccatttttttctatggaatggaCTTCAGCTTCCCGATCCGACGGTAGTGTNNNNNNNNNNNNcaaaactagcctcgacg
56	1	4081649	4081726	intergenic	3	24	72	0.846337	0.22596	TTA	.	gcgaccaaacaaaatttctggCTTCAGCTTCCCGATCCGACGGTAGTGTNNNNNNNNNNNNcatttttttatttccccca
57	1	7803774	7803801	DHS/non gene	3	9	27	0.78188	0.0326015	ATC	.	cgagttttcttccgagagatCTTCAGCTTCCCGATCCGACGGTAGTGTNNNNNNNNNNNNcgaacattcttatgtgttta
58	1	8166995	8167021	DHS/non gene	3	9	27	0.738874	0.0480384	ATT	.	gctgcaattgttgtggacttCTTCAGCTTCCCGATCCGACGGTAGTGTNNNNNNNNNNNNattctactatgcgatatgag
59	1	8738783	8738804	intergenic	3	7	21	0.435838	0.0264358	AAG	.	attattccggttgagaacggCTTCAGCTTCCCGATCCGACGGTAGTGTNNNNNNNNNNNNcataacaaaataacagcagc
60	1	10679233	10679252	DHS/non gene	3	6	18	0.303382	0.0156825	AAC	.	attctcgtgaccaaattctagatCTTCAGCTTCCCGATCCGACGGTAGTGTNNNNNNNNNNNNgccctaaagtggagaaa
61	1	22597941	22597979	intergenic	3	13	39	1.09264	0.1304	ATT	.	gagacaggttgtggcgcacaCTTCAGCTTCCCGATCCGACGGTAGTGTNNNNNNNNNNNNtgatgatttattcgcaaata
62	1	29079853	29079881	intergenic	3	9	27	0.834623	0.0656575	TAA	.	aagatgagtcgatgacgctCTTCAGCTTCCCGATCCGACGGTAGTGTNNNNNNNNNNNNcgacttcaaatatgatttaa
63	2	1832516	1832535	intergenic	3	6	18	0.303382	0.0377734	TCA	.	gaaactttaatacgcacgcctCTTCAGCTTCCCGATCCGACGGTAGTGTNNNNNNNNNNNNattcatcatttttcccact
64a	2	2574439	2574474	transposon	6	5	30	0.0805604	0.00218987	CTCTAC	AT2G06490.1	gagaatctaaatctagaaaccctCTTCAGCTTCCCGATCCGACGGTAGTGTNNNNNNNNNNNNtgagaagaggctctgtg
64b	3	11867818	11867841	transposon	6	4	24	x	0.00218987	CTCTAC	AT3G30218.1	same as above (65a)
65	2	2704195	2704234	intergenic	6	5	30	0.273269	0.00219608	CAAAAG	.	gtaagacgggttgttcctccCTTCAGCTTCCCGATCCGACGGTAGTGTNNNNNNNNNNNNttcattctgttctttttaag
66	2	3183245	3183264	intergenic	3	6	18	0.303382	0.0163515	AAG	.	acatcgttgatacaagcatcaaCTTCAGCTTCCCGATCCGACGGTAGTGTNNNNNNNNNNNNtaaaggataaagctacgg
67	2	4077666	4077685	intergenic	3	6	18	0.303382	0.0161531	TTA	.	gaagcttgaatattcagattcaaCTTCAGCTTCCCGATCCGACGGTAGTGTNNNNNNNNNNNNggcataccagtaagcgt
68	2	5490658	5490691	intergenic	3	11	33	0.996479	0.102538	GAA	.	gagagttgagagagacctcagCTTCAGCTTCCCGATCCGACGGTAGTGTNNNNNNNNNNNNttcggtttttgagctccta
69	2	7450768	7450788	intergenic	3	7	21	0.37134	0.0265079	ATG	.	gtcaaagatgcagcaggtaaaaCTTCAGCTTCCCGATCCGACGGTAGTGTNNNNNNNNNNNNtctgcctcttagtccttt
70	2	10333443	10333463	5' UTR	3	7	21	0.37134	0.036275	CTT	AT2G24280.1	gtcttctcttctttgctacctCTTCAGCTTCCCGATCCGACGGTAGTGTNNNNNNNNNNNNgaagccaatgatctcaaac
71	2	14331277	14331310	DHS/non gene	3	11	33	0.996479	0.0997842	ACA	.	aaagtctctcgagcctcacgCTTCAGCTTCCCGATCCGACGGTAGTGTNNNNNNNNNNNNaaagaaatatgtttttgctt
72	2	15218449	15218469	intergenic	3	7	21	0.37134	0.00578444	GTT	.	cctcaacctctcgttctcctCTTCAGCTTCCCGATCCGACGGTAGTGTNNNNNNNNNNNNaataaaaatgatgggttctc
73a	2	15596568	15596620	transposon	6	7	42	0.694679	0.00578444	AAACTC	.	catcatctccacaccaacactCTTCAGCTTCCCGATCCGACGGTAGTGTNNNNNNNNNNNNaacaaatgactctgttaca
73b	1	17844695	17844718	transposon	6	4	24	x	0.00578444	AAACTC	AT1G48290.1	same as above (73a)
74	3	1247958	1247979	intergenic	3	7	21	0.435838	0.0516463	ATC	.	ccatgagttctcattgtcagaCTTCAGCTTCCCGATCCGACGGTAGTGTNNNNNNNNNNNNggatttaggacttgctcat
75	3	7292985	7293053	DHS/non gene	6	4	24	1.00136	0.00325446	AAAAAC	.	caaaagttactgtcggcctaaCTTCAGCTTCCCGATCCGACGGTAGTGTNNNNNNNNNNNNctgttttacaaggttgaaa
76	3	9391172	9391199	intergenic	3	9	27	0.78188	0.0619686	CAT	.	gcactactagagctcctaactCTTCAGCTTCCCGATCCGACGGTAGTGTNNNNNNNNNNNNctgttgacatgtttccaaa
77	3	11174856	11174915	intergenic	3	20	60	0.997593	0.243182	TCA	.	cgtaacaaggcattaacaccaCTTCAGCTTCCCGATCCGACGGTAGTGTNNNNNNNNNNNNacatcatcaatctcacgga
78	3	13090536	13090556	intergenic	3	7	21	0.37134	0.0393229	AAG	.	aattctacaccgcttgtgagaCTTCAGCTTCCCGATCCGACGGTAGTGTNNNNNNNNNNNNccctctagtgttaaaccct
79	3	13403052	13403107	intergenic	3	18	54	1.04619	NA	AAG	.	ctgaagtgtgataataggtttttaCTTCAGCTTCCCGATCCGACGGTAGTGTNNNNNNNNNNNNgaggcaagggagagtt
80	3	14807111	14807135	intergenic	3	8	24	0.6266	NA	TCT	.	aacgcgtgaaaagccgaaatgCTTCAGCTTCCCGATCCGACGGTAGTGTNNNNNNNNNNNNgcatacttccgtctacaca
81	3	16028061	16028090	DHS/non gene	3	8	24	0.764781	0.0348155	AAT	.	ggagacccaaaatgcaaaaagCTTCAGCTTCCCGATCCGACGGTAGTGTNNNNNNNNNNNNtagagaaaagaacagacaa
82	3	17704522	17704558	DHS/non gene	3	11	33	1.00818	0.0841905	ATG	.	aagtcaaccttctcatgctaatCTTCAGCTTCCCGATCCGACGGTAGTGTNNNNNNNNNNNNttgggttgtcattatacg
83	3	21483051	21483097	intergenic	3	12	36	1.10947	0.0770489	ATC	.	agaacctgaacctttgagaacgtCTTCAGCTTCCCGATCCGACGGTAGTGTNNNNNNNNNNNNgtggtggtggcagcaga
84	3	22171692	22171718	intergenic	3	9	27	0.738874	0.0576471	TTC	.	gttctctccaatgtgacatttcaCTTCAGCTTCCCGATCCGACGGTAGTGTNNNNNNNNNNNNagacatcgcctgtgtaa
85	4	2068806	2068850	intergenic	3	15	45	1.12635	0.171526	GAA	.	atcaagtctttcttggaaaagtaCTTCAGCTTCCCGATCCGACGGTAGTGTNNNNNNNNNNNNgcctacgtctgggacca
86	4	4031099	4031122	intergenic	3	8	24	0.573207	0.0284048	CTG	.	ccaccttgattatgaacatatctCTTCAGCTTCCCGATCCGACGGTAGTGTNNNNNNNNNNNNgaaacaaggtggtggtt
87	4	4254516	4254540	intergenic	3	8	24	0.6266	0.0423572	AAG	.	caaggtttgacactgttgatacaCTTCAGCTTCCCGATCCGACGGTAGTGTNNNNNNNNNNNNgagggtcactacaacgg
88	4	7842742	7842772	intergenic	3	10	30	0.904241	0.0682037	AAT	.	gtccaatgatgttgtgacaccCTTCAGCTTCCCGATCCGACGGTAGTGTNNNNNNNNNNNNtgtttttttctgagactag
89	4	11368469	11368490	intergenic	3	7	21	0.435838	0.0237157	AAG	.	gtcttctgtaaaccggtcttcaCTTCAGCTTCCCGATCCGACGGTAGTGTNNNNNNNNNNNNcggcaattcactaacaac
90	4	14814951	14814972	intergenic	3	7	21	0.435838	0.0356962	TAT	.	cattttgccgacaaaataaataatCTTCAGCTTCCCGATCCGACGGTAGTGTNNNNNNNNNNNNttggaagaccttgcca
91	4	17587552	17587583	intergenic	3	10	30	0.944588	0.0818076	AAT	.	ggagattgttttaattcggactCTTCAGCTTCCCGATCCGACGGTAGTGTNNNNNNNNNNNNcctaagtattcccagtgt
92	5	3226593	3226613	intergenic	3	7	21	0.37134	0.0360102	TTG	.	cagttgaaatagcaaattagcaaCTTCAGCTTCCCGATCCGACGGTAGTGTNNNNNNNNNNNNttgctatcgaaggtcag
93	5	12671423	12671470	intergenic	3	16	48	1.11862	NA	CTT	.	gtttttcttctttttcttctcattCTTCAGCTTCCCGATCCGACGGTAGTGTNNNNNNNNNNNNcgcatccacgaccgac
94	5	13738117	13738198	intergenic	3	20	60	0.846519	0.25463	GAT	.	agcaggtaaaggcaagatagtCTTCAGCTTCCCGATCCGACGGTAGTGTNNNNNNNNNNNNcctagtaatgggtacagta
95	5	15358867	15358890	intergenic	3	8	24	0.573207	0.035989	AAT	.	gtgattcaaatctcttgttcactCTTCAGCTTCCCGATCCGACGGTAGTGTNNNNNNNNNNNNggttttgaaagcccagg
96	5	18093295	18093314	DHS/non gene	3	6	18	0.303382	0.029767	CTT	.	gagagagagaaaggtcaagtcCTTCAGCTTCCCGATCCGACGGTAGTGTNNNNNNNNNNNNgaatctgaaatcggaataa
97	5	20084714	20084738	DHS/non gene	3	7	21	0.469246	0.0348846	TAT	.	gaccatttgtatatgtggtttgaCTTCAGCTTCCCGATCCGACGGTAGTGTNNNNNNNNNNNNaacaggttgttttcccg
98	5	25477773	25477823	intergenic	3	15	45	1.10249	0.210111	TCT	.	actaatcactcactctatcgttaCTTCAGCTTCCCGATCCGACGGTAGTGTNNNNNNNNNNNNttgccaaagaagaggcg
99	5	26118323	26118344	DHS/non gene	3	7	21	0.435838	0.039087	AAG	.	agccttcgacttgagtatttaCTTCAGCTTCCCGATCCGACGGTAGTGTNNNNNNNNNNNNtatattcgcatacccataa
100	5	26234727	26234746	DHS/non gene	3	6	18	0.303382	0.020094	TCT	.	ggtgggttatctatgtaactacgCTTCAGCTTCCCGATCCGACGGTAGTGTNNNNNNNNNNNNcgagacagttcactgaa
a this is copy number of pure STR units in the reference, VARscore is for the entire STR locus

## Sheet: Supplemental Table 2
Supplemental Table 2. STR copy number genotype calls for 100 loci across 96 diverse A. thaliana strains.
	STR ID	1	2	3	4	5	6	7	8	9	10	11	12	13	14	15	16	17	18	19	20	21	22	23	24	25	26	27	28	29	30	31	32	33	34	35	36	37	38	39	40	41	42	43	44	45	46	47	48
	Strain
	Ag-0	14	11	6	7	NA	16	14	13	7	12	5	12	49	8	NA	4	13	12	9	9	15	16	7	6	6	6	11	8	6	6	NA	6	10	7	7	7	NA	5	11	8	NA	NA	12	13	9	8	5	9
	An-1	20	10	8	7	NA	20	NA	4	NA	20	NA	10	NA	8	36	4	11	8	11	9	11	19	3	6	7	6	13	7	NA	5	7	6	12	7	7	7	NA	5	NA	7	NA	NA	12	16	NA	8	10	6
	Bay-0	20	9	6	7	NA	NA	11	8	11	7	8	10	NA	8	NA	4	10	11	11	8	19	22	12	8	6	6	13	7	NA	5	7	3	10	7	7	7	NA	5	NA	9	8	NA	7	14	9	8	4	NA
	Bil-5	13	12	9	7	NA	20	NA	8	14	7	NA	13	45	8	NA	4	NA	11	11	5	11	16	NA	6	6	7	7	7	NA	5	6	6	10	7	7	7	8	5	NA	8	7	NA	6	18	10	NA	8	NA
	Bil-7	13	NA	9	7	NA	20	NA	8	14	7	NA	13	46	8	NA	4	NA	11	11	5	11	NA	3	6	6	7	7	7	NA	5	6	6	10	7	7	7	8	5	NA	8	7	NA	6	NA	10	NA	8	NA
	Bor-1	NA	NA	NA	7	NA	15	20	NA	9	7	NA	10	NA	8	21	4	12	9	12	9	15	NA	NA	6	6	6	11	NA	NA	NA	6	6	NA	6	NA	NA	8	6	NA	7	7	NA	19	NA	9	8	5	NA
	Bor-4	13	8	6	8	NA	13	15	13	12	NA	6	13	NA	16	13	6	13	12	5	9	24	13	3	6	4	6	11	8	9	6	6	6	17	8	7	7	7	6	13	7	8	NA	20	NA	9	8	5	NA
	Br-0	15	10	6	7	NA	18	19	8	8	>43	NA	10	NA	8	15	4	13	11	11	9	14	23	3	7	4	6	11	4	6	6	6	6	10	7	7	7	11	5	7	7	7	NA	17	19	10	8	6	6
	Bur-0	NA	NA	NA	NA	NA	NA	NA	NA	NA	NA	NA	NA	NA	NA	NA	NA	NA	NA	NA	NA	NA	NA	NA	NA	NA	NA	NA	NA	NA	NA	NA	NA	NA	NA	NA	NA	NA	5	NA	NA	NA	NA	NA	NA	NA	NA	NA	NA
	C24	14	15	6	12	NA	13	NA	4	5	18	NA	11	NA	8	14	4	12	16	7	9	17	9	NA	6	4	7	13	7	7	4	6	6	10	6	7	7	NA	5	11	7	10	NA	6	NA	9	8	6	NA
	CIBC-5	NA	12	6	7	NA	23	14	5	12	4	NA	9	NA	8	14	4	15	6	11	9	11	NA	NA	6	7	6	12	7	NA	5	7	6	10	7	7	8	NA	5	8	7	7	NA	6	16	7	8	5	NA
	CIBC-17	NA	12	NA	7	NA	10	17	13	11	NA	NA	14	43	9	25	4	11	6	9	9	14	NA	2	7	6	6	12	7	9	6	NA	6	12	7	7	8	8	5	NA	7	NA	NA	20	16	9	8	5	NA
	Col-0	17	NA	6	7	NA	22	16	13	7	22	6	18	39	10	15	6	15	12	11	9	14	NA	NA	8	6	6	13	7	8	6	NA	6	12	7	7	7	8	6	NA	7	7	NA	24	NA	16	8	9	NA
	CS22491	NA	NA	NA	7	NA	19	14	NA	9	12	NA	11	>53	NA	NA	4	12	12	11	9	25	NA	NA	6	4	NA	14	NA	7	5	6	6	10	8	NA	7	10	5	NA	7	7	NA	6	NA	NA	7	7	NA
	Ct-1	NA	NA	NA	7	NA	NA	NA	5	9	11	NA	15	NA	8	14	4	NA	15	11	5	11	NA	NA	8	6	6	12	NA	NA	NA	NA	6	10	7	NA	4	NA	6	NA	8	8	NA	NA	NA	10	8	5	NA
	Cvi-0	14	NA	6	12	NA	22	NA	NA	8	11	3	9	NA	8	NA	4	NA	6	11	6	19	9	2	7	3	6	13	7	6	6	6	6	NA	NA	NA	7	8	5	NA	7	NA	NA	6	NA	9	NA	5	NA
	Eden-1	NA	NA	NA	NA	NA	NA	NA	NA	NA	NA	NA	NA	NA	NA	NA	NA	NA	NA	NA	NA	NA	NA	NA	NA	NA	NA	NA	NA	NA	NA	NA	NA	NA	NA	NA	NA	NA	NA	NA	NA	NA	NA	NA	NA	NA	NA	NA	NA
	Eden-2	NA	NA	6	7	NA	16	24	9	14	7	NA	8	NA	NA	NA	4	NA	11	11	5	19	11	NA	6	6	6	7	8	9	NA	NA	6	10	NA	7	7	10	5	NA	8	7	NA	6	13	9	7	7	NA
	Edi-0	NA	12	8	7	NA	12	19	5	10	9	NA	7	44	8	17	4	9	13	7	9	14	16	12	6	6	6	11	7	NA	5	4	6	10	7	NA	4	8	5	8	9	7	NA	6	16	10	8	3	NA
	Ei-2	17	12	6	7	NA	19	NA	4	7	21	NA	11	>53	14	NA	4	14	13	11	9	16	15	3	9	6	6	12	7	NA	5	6	6	10	7	7	4	8	5	NA	8	NA	NA	6	14	9	8	5	NA
	Est-1	NA	NA	8	7	NA	21	NA	4	7	12	5	7	51	8	13	4	10	12	10	11	17	NA	NA	6	6	5	13	7	7	10	5	6	10	7	7	7	8	5	NA	7	NA	NA	6	NA	9	8	4	NA
	Fab-2	16	NA	6	8	5	11	28	5	7	13	NA	14	NA	8	NA	4	12	11	11	9	19	14	8	6	6	7	7	8	9	NA	6	6	10	NA	7	7	9	5	NA	7	NA	NA	7	NA	9	8	7	NA
	Fab-4	16	NA	6	7	NA	16	24	5	7	13	7	8	NA	8	NA	4	12	11	7	9	19	14	8	6	6	7	7	8	NA	NA	6	6	10	NA	NA	7	3	5	4	7	NA	NA	7	NA	9	8	7	NA
	Fei-0	NA	13	NA	7	NA	NA	NA	8	NA	4	NA	19	NA	NA	30	NA	8	11	9	7	14	NA	NA	6	4	6	12	NA	7	NA	NA	6	18	8	NA	7	NA	5	NA	7	7	NA	6	16	9	8	4	8
	Ga-0	19	9	8	7	NA	NA	20	13	12	11	6	9	NA	8	15	4	11	NA	7	9	15	9	3	6	6	6	12	7	9	6	6	6	10	6	7	4	8	5	7	7	8	NA	NA	NA	19	8	4	6
	Got-7	14	NA	NA	7	NA	15	NA	5	8	7	NA	10	NA	NA	24	4	10	NA	11	9	16	NA	NA	6	6	6	11	NA	NA	6	NA	5	10	7	6	11	11	5	NA	7	7	NA	NA	NA	9	NA	5	NA
	Got-22	14	NA	6	7	NA	15	NA	5	8	7	NA	10	NA	9	24	4	10	6	11	9	16	NA	NA	6	6	6	11	8	NA	6	NA	5	10	7	6	11	11	5	NA	7	7	NA	NA	NA	9	6	5	10
	Gu-0	20	10	6	8	NA	11	19	8	11	7	NA	12	45	8	15	4	11	12	7	8	25	19	12	6	4	5	11	7	6	6	7	6	10	8	7	4	8	6	7	7	8	NA	6	15	9	6	6	7
	Gy-0	NA	NA	NA	7	NA	23	NA	4	8	7	NA	NA	NA	NA	NA	4	NA	NA	11	9	18	NA	NA	NA	6	6	10	NA	9	NA	NA	6	12	7	6	4	8	5	NA	9	NA	NA	12	NA	20	NA	3	NA
	HR-5	NA	NA	NA	7	NA	10	NA	NA	NA	16	NA	5	NA	NA	NA	2	NA	NA	9	11	18	NA	NA	NA	NA	6	12	NA	NA	NA	NA	6	10	7	NA	NA	8	5	NA	9	7	NA	6	NA	NA	NA	5	NA
	HR-10	NA	NA	NA	7	NA	NA	NA	NA	NA	12	NA	NA	NA	NA	NA	NA	NA	NA	NA	NA	11	NA	NA	NA	NA	NA	9	NA	7	NA	NA	6	NA	NA	NA	NA	NA	5	NA	NA	8	NA	7	NA	NA	NA	5	NA
	Kas-2	13	NA	NA	7	NA	16	NA	NA	NA	15	NA	7	NA	9	10	4	12	11	7	5	15	NA	NA	NA	4	NA	13	NA	NA	NA	NA	6	10	NA	NA	7	8	5	NA	7	NA	NA	6	NA	9	NA	5	NA
	Kin-0	19	13	6	7	NA	22	18	8	12	7	5	15	48	8	28	4	10	10	11	11	11	19	3	7	7	6	10	4	8	5	6	6	12	7	7	8	8	5	7	9	8	NA	6	12	9	8	5	8
	Knox-10	NA	NA	NA	7	NA	NA	NA	NA	NA	9	NA	7	NA	NA	NA	4	NA	NA	NA	NA	NA	NA	NA	NA	NA	NA	11	NA	NA	NA	NA	6	12	NA	NA	NA	NA	5	NA	7	7	NA	NA	NA	NA	NA	5	NA
	Knox-18	NA	11	NA	7	NA	11	22	4	8	20	NA	7	NA	8	NA	4	14	6	9	9	16	14	3	7	4	6	11	8	9	5	7	6	11	6	NA	8	NA	5	7	7	7	NA	6	NA	10	8	10	NA
	Kondara	12	8	8	7	NA	15	NA	12	7	7	NA	15	NA	7	41	4	13	6	7	9	15	14	3	6	4	NA	13	7	8	5	7	6	NA	7	NA	7	5	5	8	7	7	NA	6	18	10	7	4	NA
	Kz-1	20	8	8	7	NA	15	NA	8	8	27	5	13	NA	9	11	4	13	6	11	5	19	21	11	6	4	6	13	7	NA	5	5	6	10	7	NA	7	NA	5	14	8	NA	NA	6	18	9	7	6	NA
	Kz-9	20	8	8	7	7	16	NA	9	10	7	4	8	NA	7	11	4	9	6	7	9	20	14	2	6	7	6	11	7	7	6	NA	6	10	7	7	7	9	5	8	7	7	NA	6	20	9	7	4	6
	Ler-1	19	10	6	7	NA	16	NA	4	8	9	5	13	NA	8	24	4	12	6	11	9	13	13	3	7	4	5	12	7	6	5	7	3	10	7	7	7	8	5	7	7	8	NA	6	21	18	8	5	6
	LL-0	19	10	6	7	NA	16	NA	4	8	9	5	13	NA	8	24	4	12	6	11	9	13	13	3	7	4	5	12	7	6	5	7	3	10	7	7	7	5	5	7	7	8	NA	6	21	18	8	5	6
	Lov-1	NA	NA	6	7	NA	10	NA	NA	14	7	NA	14	NA	NA	NA	4	NA	NA	11	9	NA	NA	NA	6	4	NA	7	NA	NA	NA	NA	6	13	NA	6	NA	NA	5	NA	8	7	NA	6	NA	10	NA	4	NA
	Lov-5	NA	NA	6	7	NA	10	NA	13	14	7	NA	14	NA	8	NA	4	NA	11	11	9	19	16	NA	6	4	7	7	NA	9	NA	NA	6	13	NA	6	7	NA	5	NA	8	7	NA	6	NA	10	NA	4	NA
	Lp2-2	NA	NA	NA	7	NA	18	NA	13	NA	20	NA	9	51	NA	NA	4	NA	NA	7	NA	15	NA	NA	NA	NA	6	10	NA	NA	NA	NA	6	10	8	7	NA	NA	6	NA	7	NA	NA	19	NA	9	NA	5	NA
	Lp2-6	NA	NA	NA	7	NA	NA	NA	13	8	NA	NA	9	NA	8	13	4	11	12	7	12	17	NA	NA	7	NA	6	11	7	11	6	NA	6	18	7	7	7	NA	5	NA	7	NA	NA	19	NA	9	NA	8	NA
	Lz-0	NA	NA	NA	7	NA	22	26	NA	9	13	NA	NA	NA	NA	19	4	8	13	11	NA	18	NA	NA	6	6	5	12	4	NA	NA	7	6	12	7	7	7	NA	5	NA	7	7	NA	NA	NA	16	NA	3	NA
	Mr-0	NA	NA	NA	7	NA	NA	16	NA	NA	16	5	16	NA	NA	NA	4	NA	NA	7	11	NA	NA	NA	6	4	6	11	NA	NA	NA	NA	6	NA	7	NA	NA	8	NA	NA	7	NA	NA	6	NA	9	NA	4	NA
	Mrk-0	NA	11	6	7	NA	18	16	NA	11	9	NA	9	NA	8	26	4	10	13	11	NA	13	NA	NA	7	4	6	13	NA	8	NA	6	6	10	7	7	7	NA	5	NA	7	7	NA	7	NA	9	8	5	NA
	Ms-0	NA	NA	NA	7	NA	12	NA	NA	9	7	NA	8	NA	NA	4	NA	12	7	NA	NA	NA	NA	6	4	6	12	NA	NA	NA	NA	NA	6	10	7	7	NA	NA	6	NA	7	8	NA	6	NA	9	NA	5	NA
	Mt-0	NA	15	6	7	NA	13	13	8	9	16	NA	7	NA	15	36	4	11	NA	11	9	20	21	2	8	6	6	9	7	10	5	7	6	12	7	7	7	8	6	7	7	7	NA	NA	15	9	8	6	NA
	Mz-0	NA	NA	NA	7	NA	22	NA	NA	9	26	NA	NA	NA	NA	NA	4	NA	11	NA	9	16	NA	NA	NA	NA	6	11	NA	7	NA	NA	6	14	7	7	NA	NA	6	NA	7	NA	NA	12	NA	9	NA	5	NA
	Nd-1	18	10	6	9	NA	9	18	7	11	20	NA	7	>53	9	13	9	11	12	7	9	15	NA	3	6	6	6	11	7	10	5	3	6	12	6	7	7	NA	6	7	8	7	NA	6	21	9	8	9	14
	NFA-8	NA	NA	NA	7	NA	10	14	NA	8	12	NA	9	NA	8	NA	4	NA	11	8	9	18	NA	NA	9	6	6	12	7	NA	NA	6	6	12	7	NA	8	NA	5	NA	7	NA	NA	6	NA	NA	NA	5	NA
	NFA-10	22	12	6	7	NA	18	18	8	8	16	NA	9	>53	8	14	2	10	11	8	11	11	18	12	7	7	6	12	7	6	6	6	6	12	8	7	7	NA	5	15	11	NA	NA	6	16	20	8	5	6
	Nok-3	22	14	8	10	6	13	NA	4	9	25	5	15	NA	8	14	4	12	13	6	5	22	16	2	9	6	6	9	8	8	5	8	6	12	7	7	7	8	6	8	9	8	NA	22	21	9	8	8	8
	Omo2-1	19	10	6	8	NA	16	15	13	7	7	NA	9	NA	8	17	4	16	6	10	5	16	22	3	6	6	9	12	4	4	5	6	6	12	6	7	7	8	6	15	9	NA	NA	6	20	9	7	9	6
	Omo2-3	19	11	6	7	7	13	NA	13	7	7	5	14	NA	8	17	4	16	6	7	9	17	21	3	6	7	5	12	4	10	5	6	6	12	7	NA	7	8	6	11	7	NA	NA	6	NA	9	7	6	NA
	Oy-0	17	10	6	7	NA	22	NA	13	10	4	NA	8	NA	NA	16	4	9	10	11	9	23	NA	NA	6	6	6	11	NA	NA	6	NA	6	19	7	7	7	8	6	NA	7	NA	NA	6	NA	9	NA	5	NA
	Pna-10	NA	NA	6	7	NA	NA	11	4	7	9	5	7	NA	8	15	4	13	8	9	9	16	NA	NA	6	4	6	11	NA	9	5	NA	6	12	7	6	8	NA	5	NA	7	7	NA	6	NA	10	NA	5	NA
	Pna-17	20	12	6	7	NA	13	11	4	10	26	5	7	NA	8	21	4	13	11	11	9	14	16	7	6	6	6	11	8	9	5	6	6	14	7	6	8	NA	5	12	7	7	NA	6	NA	10	7	5	NA
	Pro-0	19	12	8	7	NA	19	NA	13	8	9	5	12	NA	8	26	2	12	13	10	9	16	19	7	6	6	6	14	8	8	5	7	6	10	7	7	8	8	5	15	7	7	NA	7	20	5	9	5	6
	Pu2-7	21	15	6	7	NA	13	22	13	10	33	7	9	NA	8	13	4	12	6	7	9	16	16	6	6	4	6	13	7	6	5	NA	6	10	7	7	7	8	5	7	7	NA	NA	NA	14	9	8	6	6
	Pu2-23	13	11	6	8	3	13	24	9	8	18	11	10	NA	8	15	3	11	12	7	9	15	12	3	6	4	6	11	8	6	6	6	6	10	7	7	7	8	5	10	7	7	NA	6	14	9	8	7	8
	Ra-0	18	8	6	7	NA	22	19	4	9	20	7	14	NA	8	34	NA	9	11	8	5	17	12	2	6	6	5	11	4	10	5	6	6	12	7	7	4	NA	5	16	9	7	NA	6	21	10	8	6	6
	Ren-1	20	12	8	7	5	11	10	11	12	12	5	15	NA	8	8	4	12	9	10	5	16	19	7	7	6	6	12	7	8	5	NA	6	10	7	7	7	NA	5	11	8	7	NA	12	14	9	8	5	6
	Ren-11	NA	11	8	7	NA	19	19	5	7	4	NA	15	NA	8	NA	NA	8	15	9	5	19	19	NA	7	6	6	11	7	8	5	NA	6	12	NA	NA	7	NA	5	NA	8	NA	NA	12	14	20	8	3	NA
	Rmx-A02	18	NA	NA	7	NA	NA	11	NA	11	7	NA	9	NA	8	15	4	NA	8	9	9	16	NA	NA	6	4	6	11	8	9	5	NA	6	12	7	6	8	NA	5	NA	7	7	NA	6	NA	10	NA	5	NA
	Rmx-A180	20	NA	8	7	NA	19	19	8	11	7	NA	9	NA	8	15	4	10	15	9	5	18	18	NA	9	6	6	11	NA	9	5	NA	6	12	NA	7	8	NA	5	NA	9	10	NA	6	NA	10	6	8	9
	RRS-7	17	12	6	9	NA	11	19	8	10	26	8	14	NA	8	13	4	12	11	7	9	17	21	2	7	6	6	9	7	9	6	NA	6	10	6	NA	7	NA	6	7	8	NA	NA	8	16	9	8	3	6
	RRS-10	NA	NA	6	7	NA	NA	11	4	7	9	5	7	NA	8	15	4	13	8	9	9	16	13	NA	6	4	6	11	8	9	5	NA	6	12	7	6	8	NA	5	7	7	7	NA	6	NA	10	9	5	NA
	Se-0	16	10	6	7	NA	17	10	4	9	4	5	10	NA	8	NA	4	15	6	10	11	15	14	3	7	4	5	7	8	NA	5	6	7	10	7	7	7	8	5	NA	7	7	NA	7	14	6	8	6	NA
	Shakdara	NA	NA	NA	7	NA	15	NA	NA	7	7	NA	17	NA	NA	10	4	11	6	7	9	19	NA	NA	6	NA	NA	12	NA	NA	NA	7	6	10	7	NA	4	5	5	NA	7	NA	NA	6	NA	9	NA	4	NA
	Sorbo	30	8	NA	7	NA	15	NA	NA	7	7	3	10	NA	7	NA	4	NA	NA	11	9	16	NA	NA	6	4	6	12	NA	8	NA	NA	6	NA	7	NA	NA	NA	5	NA	7	8	NA	6	NA	9	7	4	NA
	Spr1-2	NA	11	6	7	NA	19	NA	8	8	14	NA	13	NA	8	14	4	10	11	7	9	20	NA	2	6	6	6	11	7	NA	5	NA	6	10	6	7	7	8	5	7	7	7	NA	12	22	9	7	5	10
	Spr1-6	NA	NA	NA	7	NA	NA	NA	NA	NA	24	NA	10	NA	NA	14	4	NA	NA	NA	NA	NA	NA	NA	NA	NA	NA	12	NA	NA	NA	NA	6	10	NA	7	NA	8	5	NA	NA	NA	NA	6	NA	NA	NA	7	NA
	Sq-1	20	12	6	7	NA	10	14	5	11	7	14	12	NA	8	NA	2	10	11	9	11	19	14	3	7	6	6	12	7	10	5	7	6	12	7	7	8	NA	5	7	7	7	NA	6	NA	21	8	5	6
	Sq-8	22	11	6	7	NA	22	24	8	11	9	5	7	46	8	23	4	11	13	11	8	17	15	12	6	2	6	9	7	9	5	6	6	10	7	NA	7	NA	5	15	9	7	NA	6	16	9	8	3	6
	Tamm-2	16	10	6	7	5	19	NA	13	14	7	5	13	NA	8	20	4	11	11	11	5	19	9	3	6	6	6	12	7	8	5	7	6	10	8	6	9	10	5	8	8	8	NA	7	11	9	7	8	NA
	Tamm-27	16	10	6	7	5	19	NA	13	14	7	5	13	NA	8	20	4	11	11	11	5	19	9	3	6	6	6	12	7	8	5	7	6	10	8	6	9	10	5	8	8	NA	NA	7	11	9	7	8	NA
	Ts-1	19	11	6	7	NA	15	NA	4	11	9	NA	13	>53	8	26	4	15	11	11	9	13	13	3	7	4	6	14	7	8	6	7	6	10	7	7	4	10	5	NA	7	7	NA	7	NA	9	8	5	6
	Ts-5	NA	NA	NA	7	NA	24	11	4	11	4	NA	7	NA	NA	NA	4	15	10	11	5	16	NA	NA	NA	NA	6	12	7	7	NA	6	7	17	7	7	NA	8	5	NA	7	NA	NA	NA	NA	9	NA	6	NA
	Tsu-1	NA	9	NA	7	NA	10	NA	NA	9	11	NA	8	NA	NA	NA	4	NA	12	7	NA	17	NA	NA	6	6	NA	12	NA	NA	NA	NA	6	12	7	7	NA	5	5	NA	7	7	NA	12	NA	9	NA	4	NA
	Ull2-3	21	10	6	10	NA	21	NA	8	10	7	NA	15	NA	8	NA	4	11	13	10	8	19	15	NA	6	4	6	9	7	7	5	7	6	10	8	7	7	10	6	7	7	NA	NA	6	NA	18	6	5	16
	Ull2-5	22	8	6	7	NA	25	22	13	14	7	3	14	NA	8	15	4	14	6	10	9	24	11	3	6	4	5	13	4	NA	6	NA	6	10	7	7	7	8	6	4	7	7	NA	6	NA	9	8	5	NA
	Uod-1	20	11	8	7	NA	11	NA	8	8	11	NA	8	NA	15	22	4	8	11	5	5	25	12	8	7	4	6	15	7	8	6	6	6	15	8	7	7	9	5	7	9	13	NA	19	22	9	8	9	7
	Uod-7	NA	7	6	7	NA	16	NA	8	15	7	NA	10	NA	8	15	4	8	15	8	9	22	21	3	7	4	6	11	7	NA	5	5	6	10	8	7	7	8	5	7	7	NA	NA	NA	23	9	9	5	NA
	Van-0	17	12	6	7	NA	12	19	8	7	20	5	13	NA	9	15	4	8	13	10	8	15	13	2	8	6	6	11	7	6	6	5	6	12	7	7	4	8	5	8	7	8	NA	6	21	9	8	11	7
	Var2-1	13	10	6	7	NA	19	NA	13	10	13	NA	8	NA	8	15	4	14	6	7	9	16	9	3	6	4	7	11	4	NA	6	6	6	18	7	7	9	10	5	11	7	7	NA	6	22	10	7	6	6
	Var2-6	17	10	6	7	NA	21	NA	13	10	13	NA	8	NA	17	14	2	12	11	11	9	17	9	4	6	4	7	11	4	9	6	5	6	18	7	7	9	10	5	7	7	7	NA	6	23	10	7	6	6
	Wa-1	18	9	6	7	NA	11	NA	13	7	7	NA	13	>53	10	22	4	11	6	11	5	15	16	4	6	6	7	13	7	NA	5	7	6	10	7	NA	7	9	5	13	7	7	NA	6	21	9	8	4	6
	Wei-0	29	15	6	7	NA	16	NA	8	7	7	NA	15	NA	8	NA	4	10	6	11	5	16	12	NA	7	4	6	10	11	NA	5	7	8	12	7	NA	7	NA	6	7	7	NA	NA	7	12	16	8	6	NA
	Ws-0	20	8	8	7	NA	24	19	10	11	26	NA	12	NA	8	14	4	11	11	11	11	19	21	3	6	4	6	14	7	8	5	7	7	10	7	7	7	8	6	8	7	7	NA	6	17	9	8	5	6
	Ws-2	NA	10	6	8	NA	11	17	13	10	9	4	14	NA	8	37	4	11	6	10	5	17	16	12	7	6	5	11	7	8	5	8	6	12	7	7	7	10	5	NA	7	8	NA	6	NA	9	6	4	NA
	Wt-5	NA	NA	6	7	NA	19	NA	NA	10	7	6	7	NA	8	15	4	10	13	11	9	14	NA	NA	7	4	6	11	NA	10	5	NA	6	12	7	7	NA	8	5	NA	7	7	NA	19	NA	9	NA	5	NA
	Yo-0	NA	NA	13	7	NA	20	NA	NA	9	16	NA	10	NA	NA	15	4	NA	8	9	9	14	NA	NA	6	6	6	11	NA	9	6	NA	6	10	7	NA	8	8	5	NA	7	7	NA	6	NA	9	NA	4	NA
	Zdr-1	NA	NA	NA	7	NA	13	NA	8	9	17	5	13	>53	8	13	4	11	11	5	5	14	13	NA	7	4	6	10	7	9	6	6	6	10	7	7	7	8	5	7	7	NA	NA	6	NA	9	NA	6	NA
	Zdr-6	NA	NA	NA	7	NA	NA	NA	NA	NA	7	NA	NA	NA	NA	NA	NA	NA	NA	NA	NA	NA	NA	NA	NA	NA	NA	11	NA	3	NA	NA	6	18	8	7	NA	NA	5	NA	NA	7	NA	19	NA	10	NA	6	NA
[truncated: 52 more columns]

## Sheet: Supplemental Table 3
Supplemental Table 3. Read mapping efficiency across strains.
Strain	Total reads	Mapped reads	Informative reads	Genotyped STR loci
Ag-0	60384	52293	41262	82
An-1	30630	26023	20635	75
Bay-0	23352	18128	13603	74
Bil-5	10197	9008	6032	72
Bil-7	5110	2881	1886	66
Bor-1	3520	2037	1625	57
Bor-4	7873	4432	3329	77
Br-0	57588	52380	38917	80
Bur-0	3367	1358	67	2
C24	8498	7530	5930	72
CIBC-5	7080	5207	3578	74
CIBC-17	4036	3606	2612	66
Col-0	2778	1402	1008	65
CS22491	2678	2142	1534	56
Ct-1	1669	1286	902	47
Cvi-0	3124	1790	1350	56
Eden-1	1097	288	14	0
Eden-2	3598	3024	2098	63
Edi-0	8440	7127	4917	80
Ei-2	12253	11115	7984	77
Est-1	3784	3265	2382	70
Fab-2	4749	3445	2816	69
Fab-4	6644	5593	4493	70
Fei-0	3305	2350	1681	61
Ga-0	31851	28845	19012	80
Got-7	2875	1885	1180	52
Got-22	6672	4476	3206	68
Gu-0	23673	21631	18001	87
Gy-0	1246	877	610	34
HR-5	1059	539	371	26
HR-10	840	400	204	12
Kas-2	3586	1182	749	40
Kin-0	37949	34543	25314	87
Knox-10	949	591	236	17
Knox-18	6438	4329	3188	71
Kondara	10777	9808	7383	70
Kz-1	49272	44253	34180	76
Kz-9	189905	176717	151092	76
Ler-1	92650	84140	71437	87
LL-0	181850	168851	136888	86
Lov-1	3110	1505	675	34
Lov-5	3367	2992	1918	57
Lp2-2	1263	638	442	33
Lp2-6	1623	1259	948	49
Lz-0	2505	969	765	45
Mr-0	1324	804	548	33
Mrk-0	2518	2114	1719	62
Ms-0	958	721	483	35
Mt-0	12061	10556	4679	78
Mz-0	2047	944	494	32
Nd-1	5759	4078	2864	74
NFA-8	1568	1131	916	49
NFA-10	100452	92619	70915	84
Nok-3	140010	127230	99205	81
Omo2-1	111302	102048	81654	84
Omo2-3	229316	214607	176987	83
Oy-0	4786	2111	1215	51
Pna-10	3851	3418	2289	60
Pna-17	109216	98704	70835	79
Pro-0	113987	104907	79040	86
Pu2-7	66719	59784	41067	81
Pu2-23	215894	196282	108276	88
Ra-0	251514	235174	179260	80
Ren-1	618440	568504	478550	84
Ren-11	7156	6527	4351	64
Rmx-A02	2611	2229	1565	57
Rmx-A180	6725	3164	2267	69
RRS-7	74176	69415	55381	79
RRS-10	6113	5506	3997	72
Se-0	15364	13442	10367	78
Shakdara	1357	1148	866	42
Sorbo	2016	1637	1229	48
Spr1-2	13222	11092	7491	75
Spr1-6	989	614	243	18
Sq-1	17938	15984	11761	75
Sq-8	13843	10370	7065	80
Tamm-2	175840	159400	106986	86
Tamm-27	92794	85747	59075	85
Ts-1	255560	236193	198310	85
Ts-5	1839	1223	1001	52
Tsu-1	1767	1435	744	35
Ull2-3	7106	5747	3747	69
Ull2-5	20016	18119	12288	80
Uod-1	42658	39772	26186	81
Uod-7	16128	13477	8664	77
Van-0	150877	135354	74916	87
Var2-1	307857	276740	204993	84
Var2-6	148045	133536	90761	87
Wa-1	17243	12839	9336	76
Wei-0	9667	7875	5081	69
Ws-0	67565	60013	46779	83
Ws-2	12569	8162	5467	74
Wt-5	1873	984	758	50
Yo-0	1645	1099	769	48
Zdr-1	4439	2041	1437	62
Zdr-6	1304	418	313	18

## Sheet: Supplemental Table 4
Supplemental Table 4. STR significant associations with phenotypes using ANOVA and mixed-model.
STR ID	Phenotype	Brief phenotype description	ANOVA p-value	LRT p-value (mixed-model)	bps to closest associated SNP*
1	0W GH FT	Days to flowering in natural light from October 2002 to March 2003 without vernalization	1.85346e-07	4.96134e-05	5163584
1	FT16	Days to flowering at 16°C	4.89767e-05	ns	6906405
1	FT22	Days to flowering at 22°C	5.18952e-07	ns	8703171
1	LN16	Leaf number at flowering at 16°C	4.70547e-05	ns	8703171
1	LN22	Leaf number at flowering at 22°C	8.2546e-06	ns	8703171
3	YEL	Presence or absence of yellowing at 7 weeks	2.50839e-07	2.24023e-07	2149376
8	Width 10	plant diameter of mature plants 8 weeks post germination grown at 10°C	4.14971e-05	2.88173e-05	591039
8	YEL	Presence or absence of yellowing at 7 weeks	1.23409e-08	ns	1113271
9	0W GH FT	Days to flowering in natural light from October 2002 to March 2003 without vernalization	2.9522e-13	5.42661e-08	5188895
9	2W	Days to flowering with 2 weeks vernalization	2.0259e-07	ns	6251248
9	4W	Days to flowering with 4 weeks vernalization	9.65752e-07	ns	5188895
9	8W GH FT	Days to flowering in natural light from October 2002 to March 2003 with 8 weeks vernalization	1.41286e-05	2.05395e-05	9224646
9	8W GH LN	Leaf number at flowering in natural light from October 2002 to March 2003 with 8 weeks vernalization	1.93508e-05	1.26492e-05	970002
9	FT Diameter Field	Plant diameter at flowering of plants grown in a field	8.52224e-05	5.65752e-05	6251248
9	FT GH	Days to flowering of plants grown in a green house	1.12388e-08	6.20102e-07	2470931
9	FT16	Days to flowering at 16°C	4.9073e-10	ns	5188895
9	FT22	Days to flowering at 22°C	3.67437e-14	2.52428e-07	5188895
9	LD	Days to flowering time under long day without vernalization	6.41624e-10	2.30921e-05	2623327
9	LDV	Days to flowering time under long day with vernalization	3.04765e-05	ns	70554
9	Leaf roll 10	Leaf roll presence at 8 weeks post germination for plants grown at 10°C	5.85993e-05	2.7276e-05	6884348
9	LN22	Leaf number at flowering at 22°C	1.91857e-09	ns	963499
9	SD	Days to flowering time under short day without vernalization	3.09609e-05	ns	70554
10	FT10	Days to flowering at 10°C	5.32966e-06	1.40107e-05	5410088
10	LN10	Leaf number at flowering at 10°C	1.77266e-05	3.98758e-05	5410088
10	LN16	Leaf number at flowering at 16°C	1.40887e-05	1.57848e-05	134030
10	SDV	Days to flowering time under short day with vernalization	7.77926e-07	7.48225e-07	150795
14	YEL	Presence or absence of yellowing at 7 weeks	4.41045e-12	5.24034e-09	2156538
15	Leaf serr 10	Level of leaf serration from 0 to 1.5 at 8 weeks post germination for plants grown at 10°C	ns	4.83299e-05	7826879
22	0W	Days to flowering with 0 weeks vernalization	ns	1.35174e-05	1456063
23	LN10	Leaf number at flowering at 10°C	7.74056e-06	4.52308e-05	3422762
23	LN16	Leaf number at flowering at 16°C	5.15079e-06	3.67934e-05	3422762
26	0W GH FT	Days to flowering in natural light from October 2002 to March 2003 without vernalization	1.74164e-12	1.87136e-07	362775
26	2W	Days to flowering with 2 weeks vernalization	7.43517e-06	ns	2172995
26	4W	Days to flowering with 4 weeks vernalization	4.10405e-06	ns	362775
26	FT GH	Days to flowering of plants grown in a green house	4.00665e-06	ns	78453
26	FT10	Days to flowering at 10°C	1.07182e-07	6.70812e-05	2172995
26	FT16	Days to flowering at 16°C	9.35448e-08	ns	2172839
26	FT22	Days to flowering at 22°C	7.65121e-09	ns	344403
26	Iron (Fe56)	In planta ion concentration of Iron with ICP-MS	0.000128874	ns	NA
26	LD	Days to flowering time under long day without vernalization	1.31974e-07	ns	2172995
26	LN10	Leaf number at flowering at 10°C	1.92231e-08	3.49758e-05	2172995
26	LN16	Leaf number at flowering at 16°C	3.19378e-07	ns	2172839
26	LN22	Leaf number at flowering at 22°C	5.61005e-06	ns	2172839
26	Magnesium (Mg25)	In planta ion concentration of Cobalt with ICP-MS	7.5246e-05	ns	NA
26	SDV	Days to flowering time under short day with vernalization	4.25013e-06	2.03888e-05	88237
27	0W GH FT	Days to flowering in natural light from October 2002 to March 2003 without vernalization	1.71647e-09	ns	2950070
27	4W	Days to flowering with 4 weeks vernalization	4.62715e-06	ns	2951874
27	FT GH	Days to flowering of plants grown in a green house	5.03864e-05	ns	2950070
27	FT10	Days to flowering at 10°C	7.27674e-05	ns	2951874
27	FT16	Days to flowering at 16°C	1.15264e-08	ns	2951874
27	FT22	Days to flowering at 22°C	6.38783e-08	ns	2951874
27	LD	Days to flowering time under long day without vernalization	1.38906e-05	ns	1269703
27	LDV	Days to flowering time under long day with vernalization	3.79612e-05	ns	6217343
27	LN10	Leaf number at flowering at 10°C	1.15779e-08	ns	2951874
27	LN16	Leaf number at flowering at 16°C	3.73103e-08	ns	2952030
27	LN22	Leaf number at flowering at 22°C	6.15523e-06	ns	2952030
27	Storage 28 days	Primary dormancy (i.e. the progressive increase of germination rate after 28 days dry storage)	1.45415e-05	ns	4448297
27	Storage 7 days	Primary dormancy (i.e. the progressive increase of germination rate after 7 days dry storage)	8.29523e-10	3.99168e-07	6183059
28	4W	Days to flowering with 4 weeks vernalization	ns	4.91911e-05	4098371
28	8W	Days to flowering with 8 weeks vernalization	2.1621e-06	9.99678e-07	5908591
28	8W GH FT	Days to flowering in natural light from October 2002 to March 2003 with 8 weeks vernalization	2.13529e-05	2.08261e-05	5908591
28	8W GH LN	Leaf number at flowering in natural light from October 2002 to March 2003 with 8 weeks vernalization	5.02353e-05	3.94334e-05	8434954
28	Anthocyanin 16	Visual anthocyanin at 16°C	0.00014519	ns	NA
28	FT10	Days to flowering at 10°C	ns	1.33208e-05	4098371
28	LFS GH	Number of days between germination and senescence of the last flower	9.1033e-05	6.47798e-05	8434954
28	LN16	Leaf number at flowering at 16°C	ns	6.33087e-05	4098527
28	SD	Days to flowering time under short day without vernalization	1.0631e-05	3.4375e-05	4098527
33	Leaf roll 10	Leaf roll presence at 8 weeks post germination for plants grown at 10°C	8.85014e-06	5.42139e-06	NA
35	0W GH LN	Leaf number at flowering in natural light from October 2002 to March 2003 without vernalization	7.24488e-07	4.12995e-07	14050429
35	8W	Days to flowering with 8 weeks vernalization	0.00011521	ns	13884880
35	8W GH FT	Days to flowering in natural light from October 2002 to March 2003 with 8 weeks vernalization	4.65779e-06	8.89821e-06	13885371
35	8W GH LN	Leaf number at flowering in natural light from October 2002 to March 2003 with 8 weeks vernalization	1.27774e-06	1.07731e-06	NA
35	LC Duration GH	Number of days between germination and plant complete senescence	3.58743e-11	5.68152e-12	6720660
35	LFS GH	Number of days between germination and senescence of the last flower	1.94752e-11	5.65546e-12	6720660
35	MT GH	Number of days between last flower senescence and complete plant senescence	1.39764e-06	1.08691e-06	7537899
35	SD	Days to flowering time under short day without vernalization	2.02137e-08	3.11883e-07	NA
36	FT GH	Days to flowering of plants grown in a green house	ns	3.80575e-05	NA
36	FT22	Days to flowering at 22°C	ns	4.26302e-06	NA
36	LD	Days to flowering time under long day without vernalization	ns	2.41084e-06	NA
36	OW GH FT	Non-monotonous dynamic of dormancy release	ns	3.76136e-08	243268
39	YEL	Presence or absence of yellowing at 7 weeks	0.000100267	4.03346e-05	554696
41	DSDS50	Duration of seed dry storage required for 50% of seeds to germinate	ns	6.64263e-05	9035119
46	LC Duration GH	Number of days between germination and plant complete senescence	6.90433e-05	3.88594e-05	NA
46	LD	Days to flowering time under long day without vernalization	ns	3.48279e-06	266244
46	LFS GH	Number of days between germination and senescence of the last flower	0.000113522	6.60572e-05	5257435
46	Trichome number C	Average trichome density in control conditions	8.18632e-05	ns	443371
47	FT10	Days to flowering at 10°C	3.54837e-05	ns	8061387
47	FT16	Days to flowering at 16°C	9.00402e-05	ns	8062065
47	LN10	Leaf number at flowering at 10°C	4.5865e-05	ns	8061387
47	Secondary Dorm	Decrease in germination rate after 6-week exposure to 4°C	7.41866e-05	ns	163794
47	Storage 7 days	Primary dormancy (i.e. the progressive increase of germination rate after 7 days dry storage)	2.23e-05	ns	170840
49	Lear serr 22	Level of leaf serration from 0 to 1.5 at 5 weeks post germination for plants grown at 22°C	2.61091e-05	5.51756e-06	13130381
50	0W	Days to flowering with 0 weeks vernalization	ns	3.18271e-05	5430144
54	PNA3.3a (At2)	Disease presence or absence on 1-10 scale four days after inoculation withPNA3.3 Pseudomonas viridiflava isolate	3.75087e-05	2.08812e-05	789315
56	FT GH	Days to flowering of plants grown in a green house	7.16875e-06	ns	193574
56	LD	Days to flowering time under long day without vernalization	0.00011426	ns	2228116
56	LDV	Days to flowering time under long day with vernalization	2.58029e-09	3.92188e-08	977353
56	LES	Presence or absence of lesioning at 7 weeks	4.87525e-05	ns	16344873
56	LN10	Leaf number at flowering at 10°C	6.72438e-07	ns	2288116
56	LN16	Leaf number at flowering at 16°C	7.73845e-06	ns	2287960
56	LN22	Leaf number at flowering at 22°C	0.000104044	ns	2287960
57	FT10	Days to flowering at 10°C	6.5783e-05	4.74286e-05	1434009
57	LD	Days to flowering time under long day without vernalization	0.000147632	6.13655e-05	248162
57	SD	Days to flowering time under short day without vernalization	0.000108344	ns	1434165
68	Molybdenum (Mo98)	In planta ion concentration of Molybdenum with ICP-MS	ns	7.55167e-05	5450755
69	YEL	Presence or absence of yellowing at 7 weeks	1.82185e-05	ns	9106044
70	FRI	FRI gene expression	7.62963e-05	2.01863e-05	8714775
71	0W GH FT	Days to flowering in natural light from October 2002 to March 2003 without vernalization	1.25569e-05	ns	1180103
71	DSDS50	Duration of seed dry storage required for 50% of seeds to germinate	3.37514e-05	ns	2398128
71	FT16	Days to flowering at 16°C	6.34206e-05	ns	2922924
71	FT22	Days to flowering at 22°C	7.13795e-07	4.48787e-05	4719690
71	LD	Days to flowering time under long day without vernalization	1.30351e-06	8.52631e-06	1180103
71	Leaf roll 10	Leaf roll presence at 8 weeks post germination for plants grown at 10°C	9.98298e-05	5.07098e-05	NA
71	LN22	Leaf number at flowering at 22°C	6.15594e-05	ns	4719690
75	FT10	Days to flowering at 10°C	ns	6.20465e-05	6659094
75	Germ 16	Days to germination at 16°C	ns	3.72495e-05	21258
82	0W GH FT	Days to flowering in natural light from October 2002 to March 2003 without vernalization	2.20938e-05	ns	2701178
82	Cobalt (Co59)	In planta ion concentration of Cobalt with ICP-MS	0.000130847	ns	NA
82	FT22	Days to flowering at 22°C	1.512e-05	ns	NA
90	Phosphorus (P31)	In planta ion concentration of Phosphorus with ICP-MS	6.42697e-05	4.80222e-05	NA
90	Trichome number C	Average trichome density in control conditions	6.67188e-05	ns	6517420
92	0W GH FT	Days to flowering in natural light from October 2002 to March 2003 without vernalization	2.79034e-08	2.38918e-05	16298918
92	2W	Days to flowering with 2 weeks vernalization	1.27128e-05	ns	38265
92	4W	Days to flowering with 4 weeks vernalization	4.26154e-05	ns	15381135
92	FRI	FRI gene expression	1.72415e-05	ns	997407
92	FT GH	Days to flowering of plants grown in a green house	1.05575e-05	3.24134e-05	962345
92	FT10	Days to flowering at 10°C	9.62677e-06	ns	38265
92	FT16	Days to flowering at 16°C	1.22018e-08	ns	38265
92	FT22	Days to flowering at 22°C	1.83952e-08	ns	38265
92	LD	Days to flowering time under long day without vernalization	1.03899e-07	ns	38265
92	LN10	Leaf number at flowering at 10°C	4.16661e-06	ns	15373448
92	LN16	Leaf number at flowering at 16°C	4.97887e-07	ns	38265
92	LN22	Leaf number at flowering at 22°C	4.51246e-06	ns	38265
92	LP23.1a CFU2 (At1 CFU2)	Number of colony-forming units/leaf area of the LP23.1a strain of Psuedomonas viridiflava	6.08592e-06	4.45949e-06	6292349
92	Storage 7 days	Primary dormancy (i.e. the progressive increase of germination rate after 7 days dry storage)	9.75756e-05	ns	48361
93	LD	Days to flowering time under long day without vernalization	0.000135342	ns	5954211
93	LDV	Days to flowering time under long day with vernalization	1.46871e-06	2.14073e-06	5928506
94	Sulfur (S34)	In planta ion concentration of Sulfur with ICP-MS	ns	6.25594e-05	NA
98	LN10	Leaf number at flowering at 10°C	0.000117964	ns	3311595
98	Silique Length 22	Silique length in plants grown at 22°C	9.98466e-06	6.82476e-06	1307227
*NA indicates no linked SNVs for this phenotype on same chromosome as STR
